# Supplementary material for: A high-throughput 3D bioprinted cancer cell migration and invasion model with versatile and broad biological applicability
Source: Royal Society of Chemistry journal article supplement (doi:10.1039/d2bm00651k), 2022-01-01
Supplement: d2bm00651k11.pdf [file d2bm00651k11.pdf]

**A high-throughput 3D bioprinted cancer cell migration and invasion model with  
versatile and broad biological applicability**

MoonSun Jung,<sup>a,b,c</sup> Joanna N. Skhinas,<sup>a,b</sup> Eric Y. Du,<sup>b,d</sup> M.A. Kristine Tolentino,<sup>b,d</sup> Robert H. Utama,<sup>e</sup> Martin Engel,<sup>e</sup> Alexander Volkerling,<sup>e</sup> Andrew Sexton,<sup>e</sup> Aidan P. O'Mahony,<sup>e</sup> Julio C. C. Ribeiro,<sup>e</sup> J. Justin Gooding,<sup>b,d\*</sup> and Maria Kavallaris,<sup>a,b,c\*</sup>

**Affiliations**

<sup>a</sup> Children's Cancer Institute, Lowy Cancer Research Center, UNSW Sydney, NSW, 2052, Australia

<sup>b</sup> Australian Center for NanoMedicine, UNSW Sydney, NSW 2052, Australia

<sup>c</sup> School of Women and Children's Health, Faculty of Medicine and Health, UNSW Sydney, NSW, 2052, Australia

<sup>d</sup> School of Chemistry, UNSW Sydney, NSW 2052, Australia

<sup>e</sup> Inventia Life Science Pty Ltd, Sydney, NSW 2015, Australia

**Supplementary data**

**Supplementary Figure 1.**

**Supplementary Figure 2.**

**Movies**

## Supplementary data

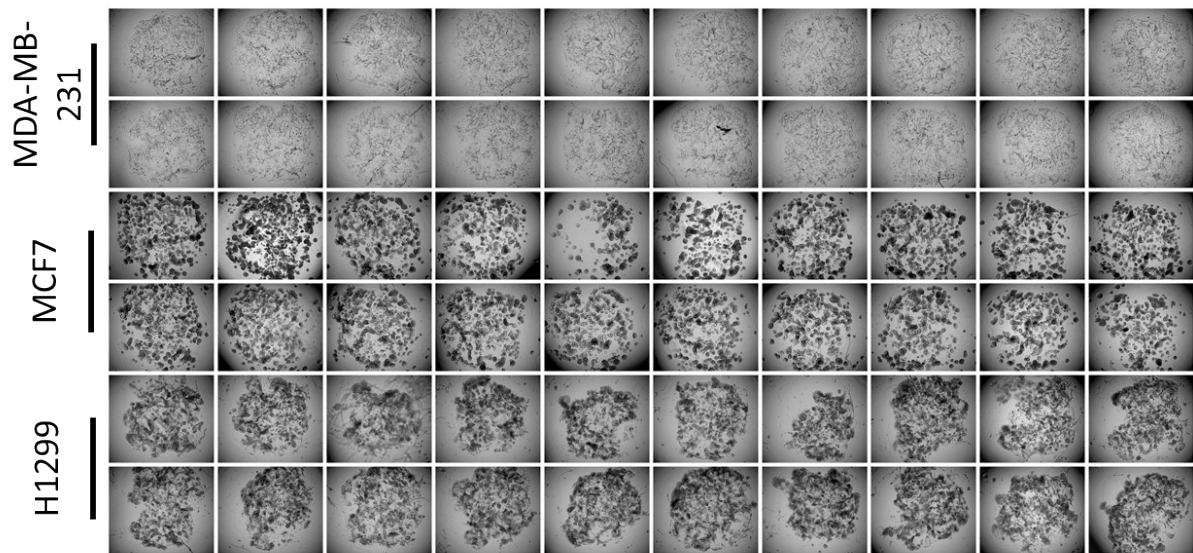

### Supplementary Figure 1. Generation of multiple cell models in a 96 well plate

The HTP 3D bioprinting platform allows to print up to 3 different cancer models in a multi-well plate. MDA-MB-231, MCF7 and H1299 cells were bioprinted with 0.7 kPa+RGD hydrogels in the inner 60 wells of a 96 well plate. The plate was incubated at 37 °C for 7 days. Bright-field images were taken at a single plane (5X objective).

## MCF7 cells at Day 0 (2 h post-printing)

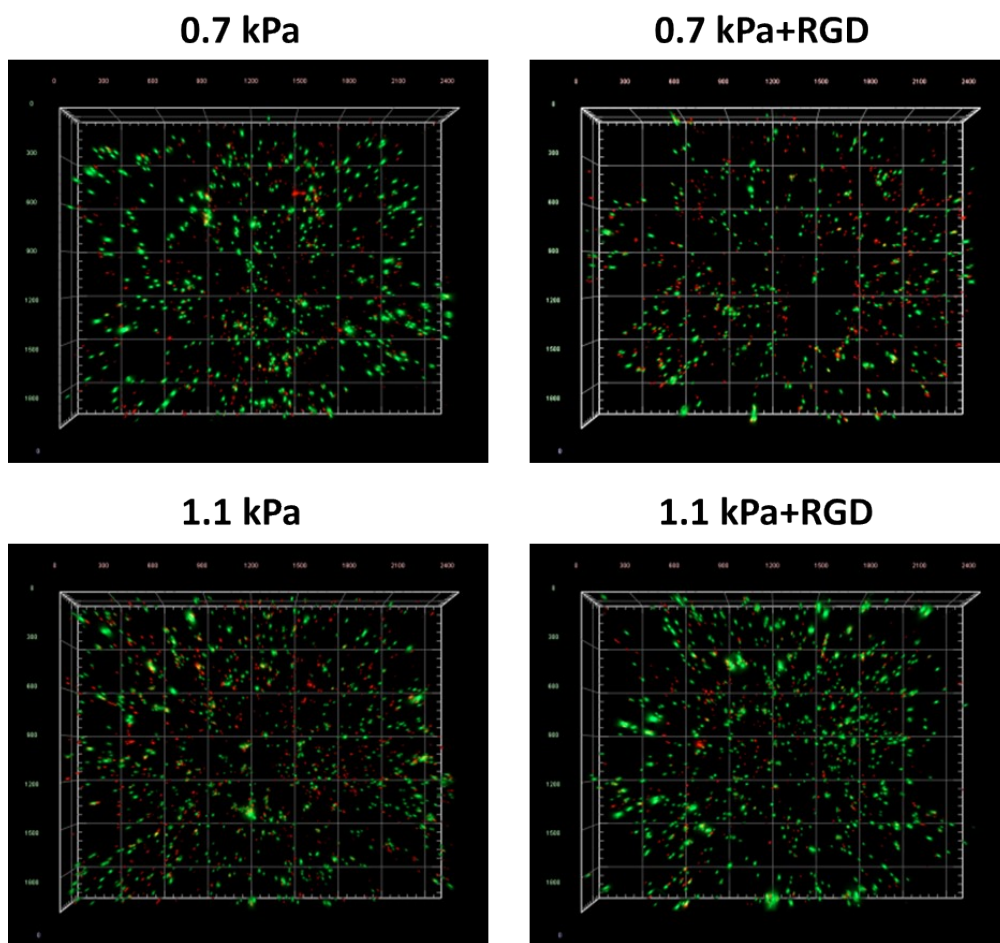

### Supplementary Figure 2. Cell viability of MCF7 bioprinted cells at Day 0 post-printing

MCF7 cancer cells were bioprinted with each hydrogel combination (0.7 kPa±RGD or 1.1 kPa±RGD) in 96 well plates and incubated for 2 h at 37 °C. Cells were stained with calcein-AM (green; live)/ethidium homodimer (red; dead) Live/Dead Assay and z-stack 3D images were taken at day 0 post-printing (5X objective).

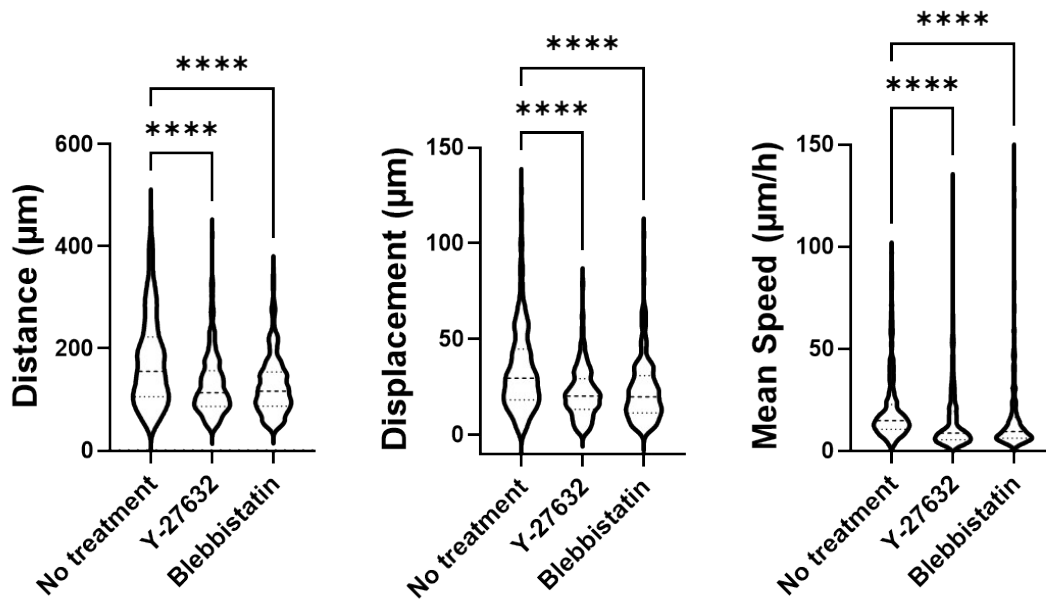

| MDA-MB-231<br>in 0.7kPa+RGD gels | No Treatment | Y-27632 | Blebbistatin |
|----------------------------------|--------------|---------|--------------|
| Number of cells                  | 358          | 300     | 326          |
| Median Distance (µm)             | 155.5        | 113.9   | 117.0        |
| Median Displacement (µm)         | 29.59        | 20.18   | 19.86        |
| Median Mean Speed (µm/h)         | 14.75        | 8.741   | 9.484        |

Kruskal-Wallis test \*\*\*\*P<0.0001

### Supplementary Figure 3. Chemical inhibitors of MDA-MB-231 cell migration within 0.7 kPa+RGD hydrogels

MDA-MB-231 cells were bioprinted in 0.7 kPa+RGD hydrogels. Either Y-27632 (a ROCK inhibitor) or Blebbistatin (a global myosin inhibitor) were treated in different wells in a 96 well plate. 3D cell movement of MDA-MB-231 cells in the absence or presence of the inhibitors was compared and quantitated. Kruskal–Wallis one-way analysis with a post hoc Dunn test was performed. \*\*\*\*P<0.0001

## **Movies.**

[Movie 1.](#) MCF7 in Matrigel

[Movie 2.](#) MDA-MB-231 in Matrigel

[Movie 3.](#) MCF7 in a 0.7 kPa bioprinted gel

[Movie 4.](#) MDA-MB-231 in a 0.7 kPa+RGD bioprinted gel

[Movie 5.](#) MDA-MB-231 tracking in 1.1 kPa RGD\_No Treatment

[Movie 6.](#) MDA-MB-231 tracking in 1.1 kPa RGD\_Blebbistatin

[Movie 7.](#) MDA-MB-231 tracking in 1.1 kPa RGD\_ROCK inhibitor

[Movie 8.](#) H1299 tracking in 0.7 kPa RGD\_No Treatment

[Movie 9.](#) H1299 tracking in 0.7 kPa RGD\_ROCK inhibitor

[Movie 10.](#) H1299 tracking in 0.7 kPa RGD\_Blebbistatin
